# Supplementary material for: Human gut microbiota is associated with HIV-reactive immunoglobulin at baseline and following HIV vaccination
Source: PubMed Central journal article supplement (PMC6927600; doi:10.1371/journal.pone.0225622), 2019-12-23
Supplement: pone.0225622.s001.pdf [file pone.0225622.s001.pdf]

A

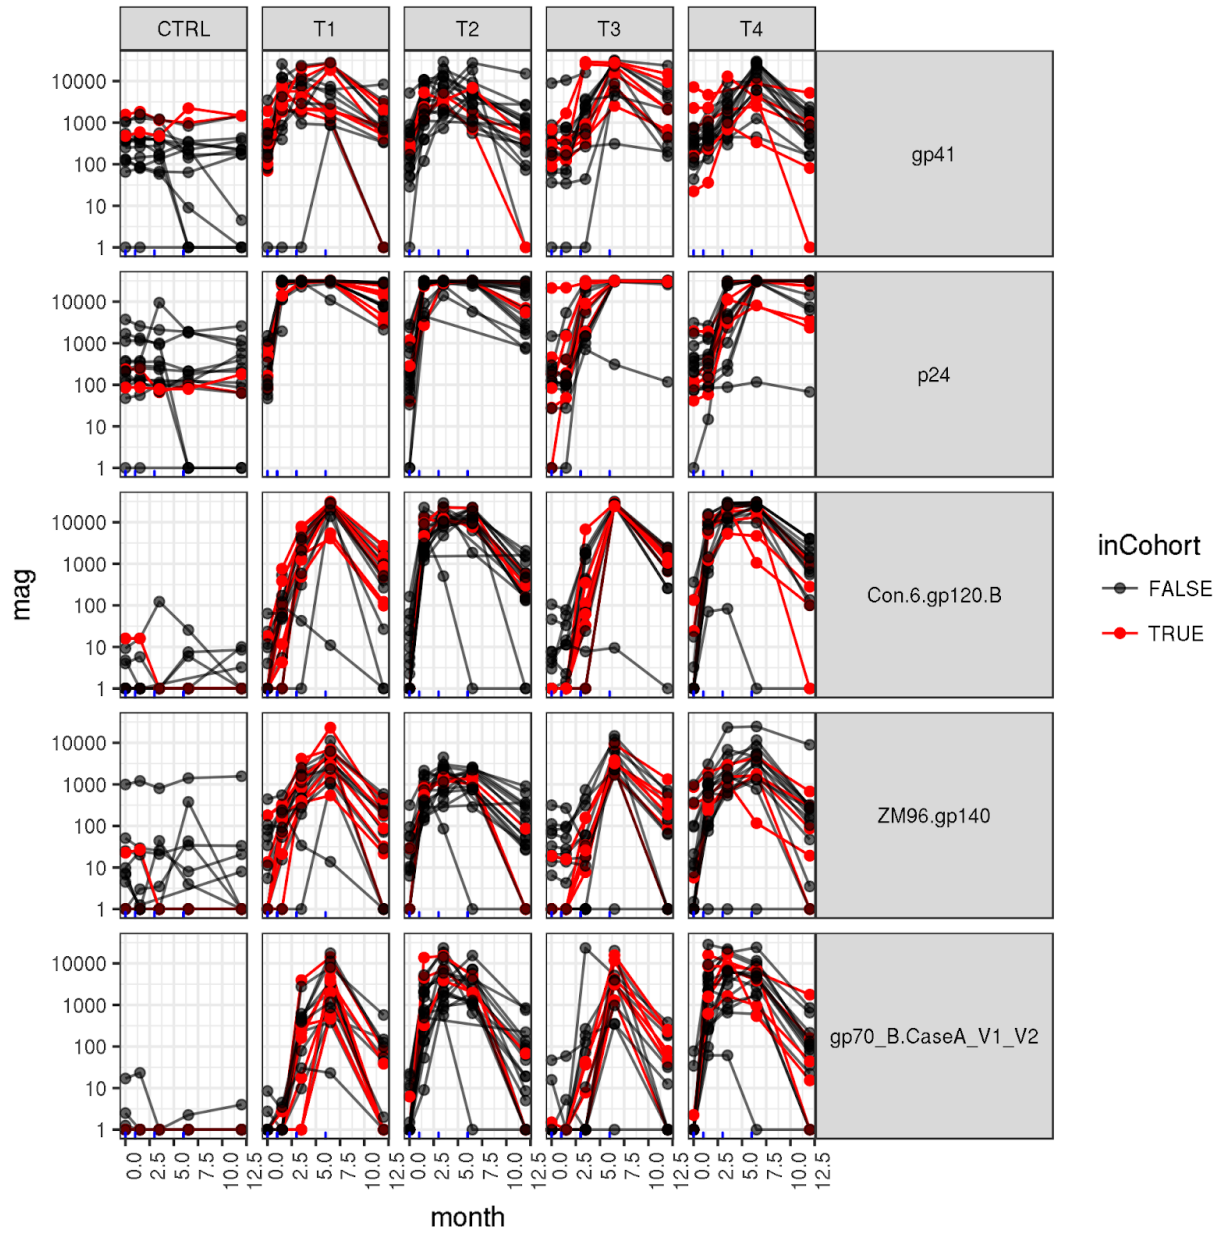

**B**

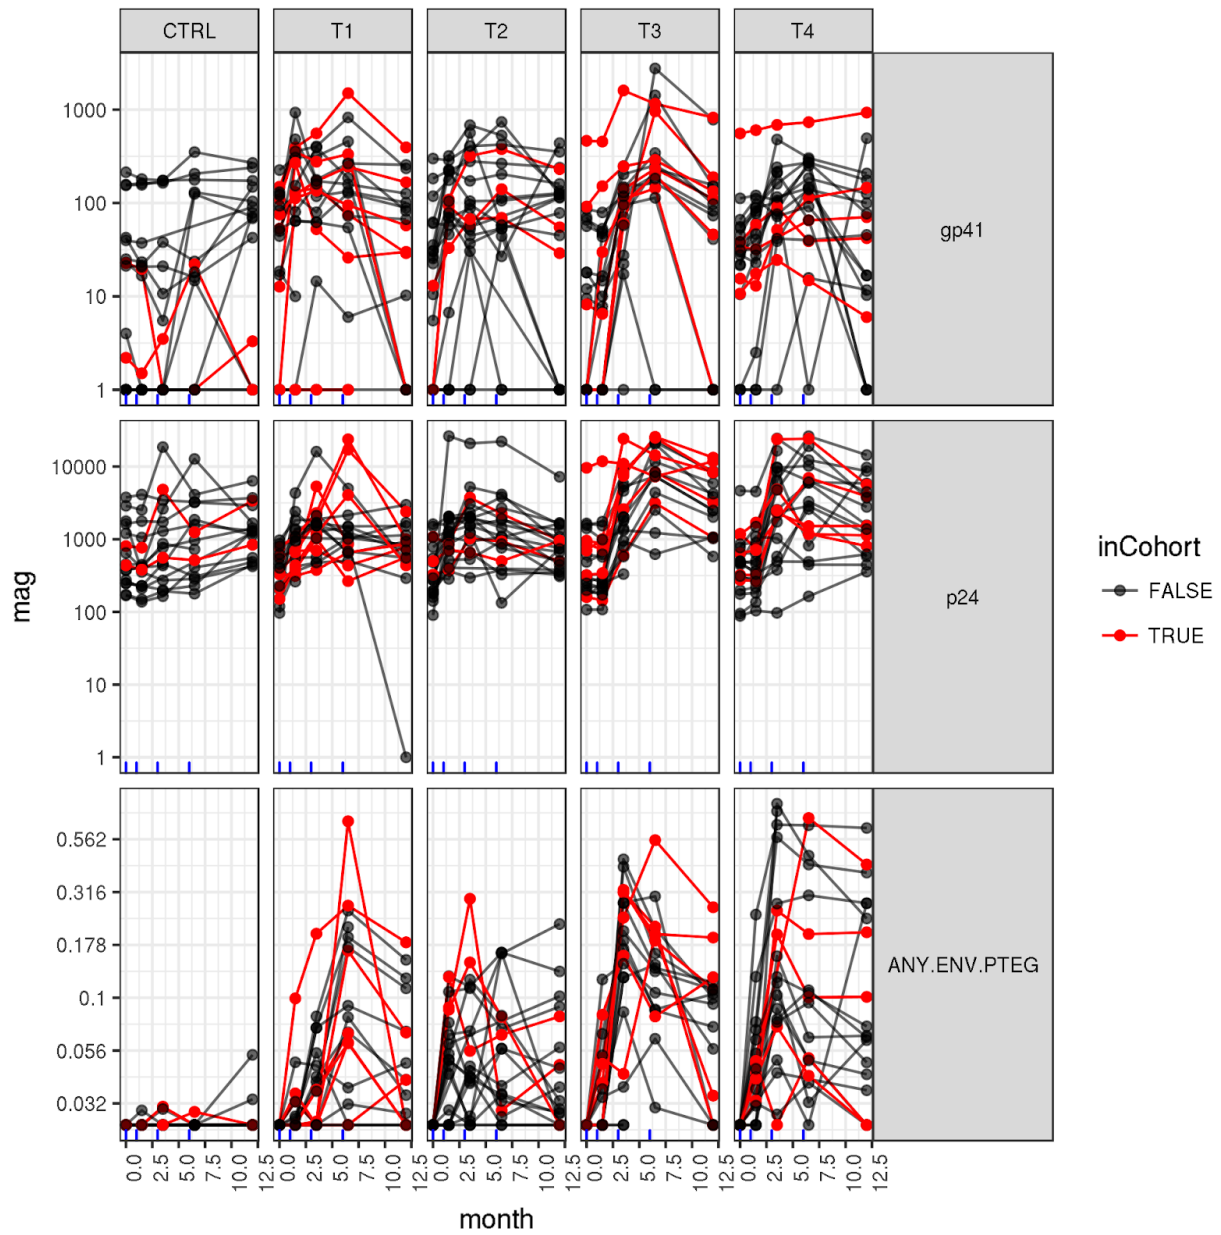

S1 Fig. **A** Concentration of IgG binding antibodies over time and **B** concentration of IgA binding antibodies, and Env specific CD4+ Helper cells among all study participants, including those without microbiota sequencing.
