# Supplementary material for: Human gut microbiota is associated with HIV-reactive immunoglobulin at baseline and following HIV vaccination
Source: PubMed Central journal article supplement (PMC6927600; doi:10.1371/journal.pone.0225622), 2019-12-23
Supplement: pone.0225622.s003.pdf [file pone.0225622.s003.pdf]

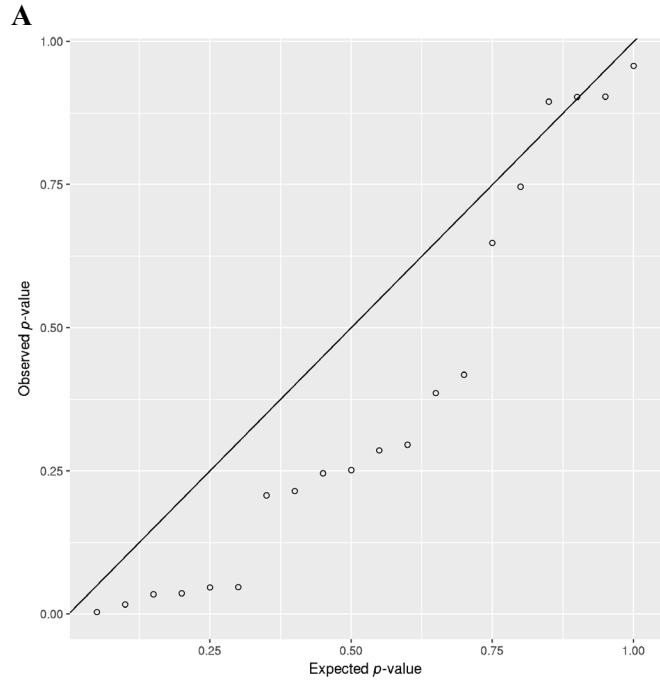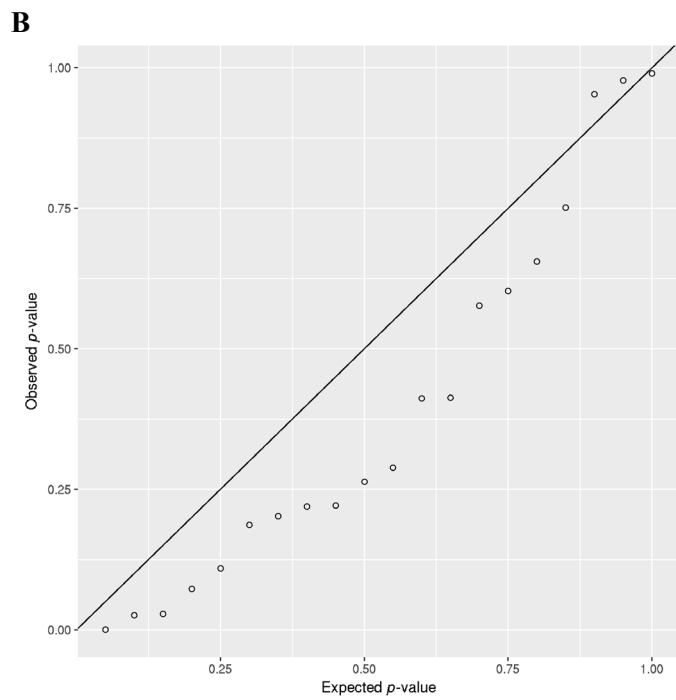

S3 Fig. Q-Q Plots comparing observed to expected kernel regression  $p$ -values for both (A) logistic (Corresponding to Table 1) and (B) gaussian glm models (corresponding to Table S2). The diagonal is the 1:1 line. Points below the diagonal indicate associations with  $p$ -values that were lower than expected from a uniform distribution of  $p$ -values.
