# Supplementary material for: Human gut microbiota is associated with HIV-reactive immunoglobulin at baseline and following HIV vaccination
Source: PubMed Central journal article supplement (PMC6927600; doi:10.1371/journal.pone.0225622), 2019-12-23
Supplement: pone.0225622.s004.pdf [file pone.0225622.s004.pdf]

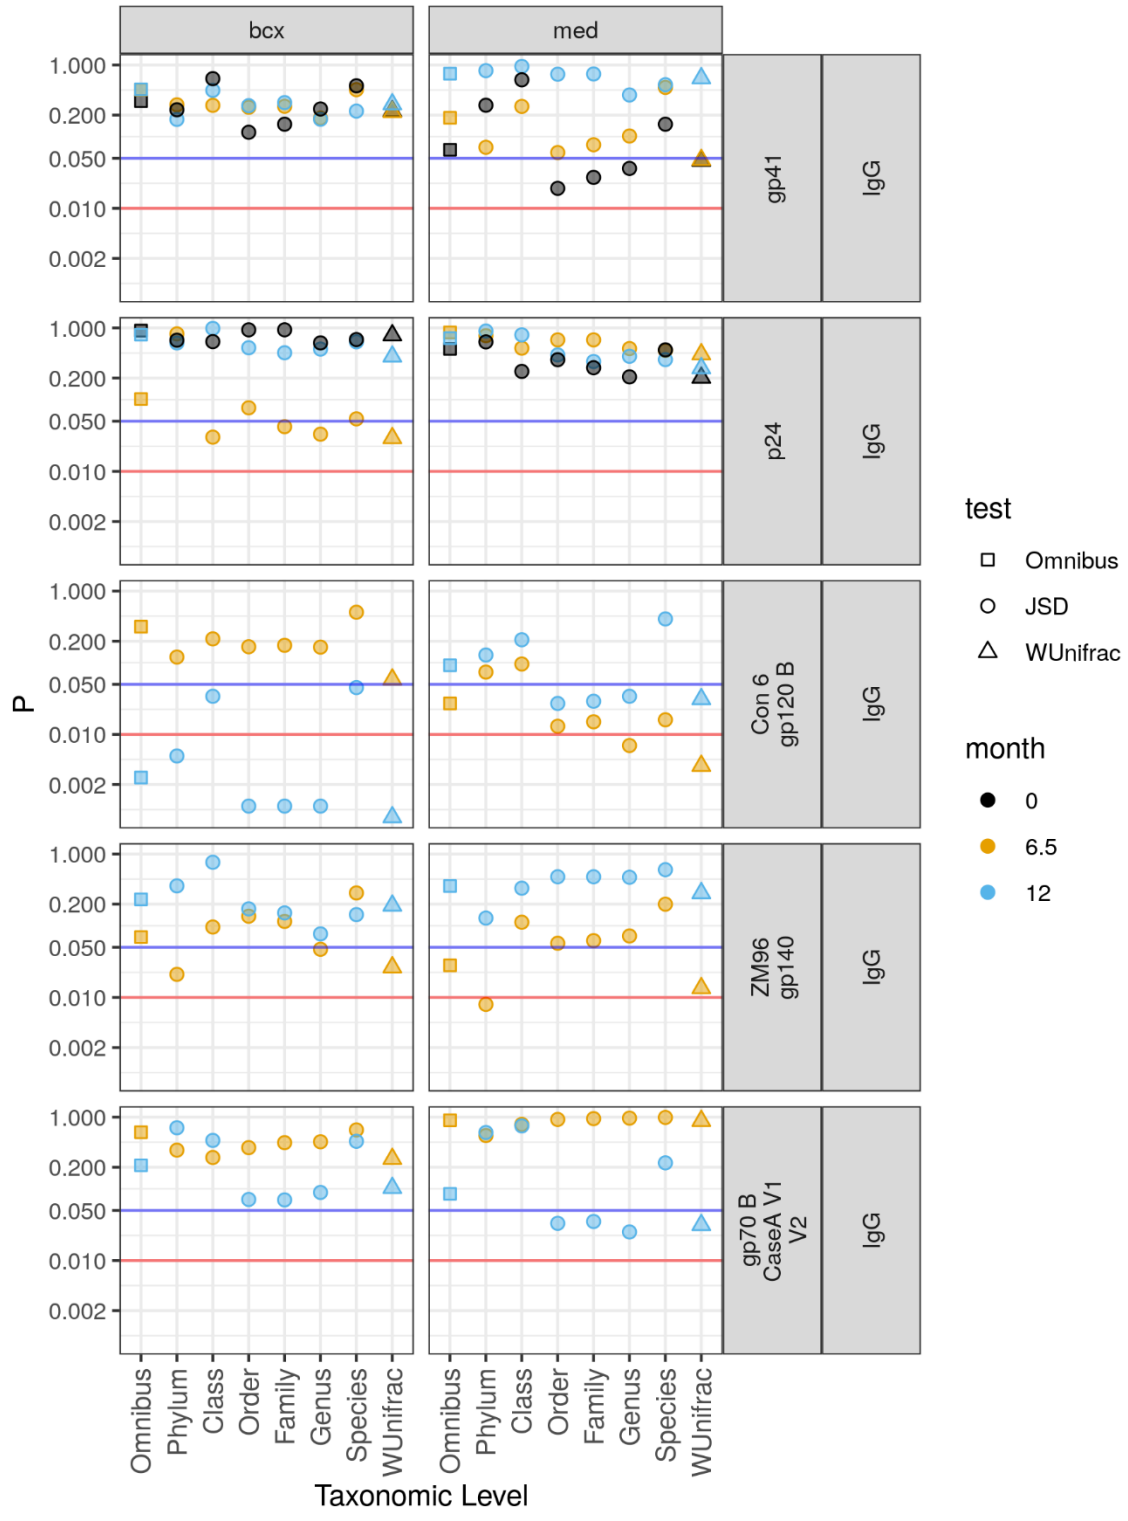

S4 Fig. Kernel regression  $p$ -values of using kernels calculated from Jensen-Shannon distance matrices calculated from SV tables that have been agglomerated to different (Phylum through Species level)

taxonomic levels. Squares indicate omnibus  $p$ -values, which indicate whether there is a statistically meaningful hit at any taxonomic level, adjusting for multiple comparisons [2]. Triangles indicate kernel regression  $p$ -values for weighted UniFrac scores and are identical to ones reported in Tables 1 and S1.
