# Supplementary material for: Human gut microbiota is associated with HIV-reactive immunoglobulin at baseline and following HIV vaccination
Source: PubMed Central journal article supplement (PMC6927600; doi:10.1371/journal.pone.0225622), 2019-12-23
Supplement: pone.0225622.s010.pdf [file pone.0225622.s010.pdf]

S4 Table. Coefficients, R<sup>2</sup> values and significance values of the relationship between alpha diversity and box-cox transformed and then z-normalized immunogenicity responses calculated using the beta function in breakaway. Highlighting and FDR calculations were applied as described in Table 1. R<sup>2</sup> values were calculated from the pearson correlation coefficient between alpha diversity and median split immunogenicity values.

| Type | Antigen            | Month | Coef         | R <sup>2</sup> | P                 | FDR              |
|------|--------------------|-------|--------------|----------------|-------------------|------------------|
| CD4+ | Any ENV PTEG       | 6.5   | <b>30.50</b> | 0.13           | <b>0.016</b>      | <b>0.064</b>     |
|      |                    | 12.0  | 27.49        | 9.9e-04        | 0.094             | 0.235            |
| IgA  | gp41               | 0.0   | -6.51        | 0.03           | 0.718             | 0.818            |
|      |                    | 6.5   | 2.15         | 0.06           | 0.890             | 0.890            |
|      |                    | 12.0  | <b>32.88</b> | 0.09           | <b>0.045</b>      | <b>0.150</b>     |
|      | p24                | 0.0   | -6.77        | 2.8e-04        | 0.714             | 0.818            |
|      |                    | 6.5   | 15.87        | 0.03           | 0.374             | 0.680            |
|      |                    | 12.0  | 25.20        | 0.06           | 0.226             | 0.452            |
| IgG  | Con.6.gp120.B      | 6.5   | 6.48         | 2.4e-06        | 0.706             | 0.818            |
|      |                    | 12.0  | 5.36         | 7.9e-05        | 0.736             | 0.818            |
|      | gp41               | 0.0   | 10.14        | 1.2e-04        | 0.510             | 0.774            |
|      |                    | 6.5   | <b>29.66</b> | 0.18           | <b>0.002</b>      | <b>0.010</b>     |
|      |                    | 12.0  | <b>31.71</b> | 0.17           | <b>&lt; 0.001</b> | <b>&lt;0.001</b> |
|      | gp70 B.CaseA V1-V2 | 6.5   | 3.24         | 2.1e-03        | 0.861             | 0.890            |
|      |                    | 12.0  | <b>36.15</b> | 0.03           | <b>&lt; 0.001</b> | <b>&lt;0.001</b> |
|      | p24                | 0.0   | -14.39       | 0.1            | 0.421             | 0.702            |
|      |                    | 6.5   | 21.71        | 0.14           | 0.175             | 0.389            |
|      |                    | 12.0  | 31.96        | 0.21           | 0.060             | <b>0.171</b>     |
|      | ZM96.gp140         | 6.5   | 8.40         | 4.7e-04        | 0.542             | 0.774            |
|      |                    | 12.0  | <b>32.21</b> | 0.09           | <b>&lt; 0.001</b> | <b>&lt;0.001</b> |
