# Supplementary material for: Human gut microbiota is associated with HIV-reactive immunoglobulin at baseline and following HIV vaccination
Source: PLOS journal article supplement (doi:10.1371/journal.pone.0225622), 2019-12-23
Supplement: S2 (10.1371/journal.pone.0225622.s002) [file journal.pone.0225622.s002]

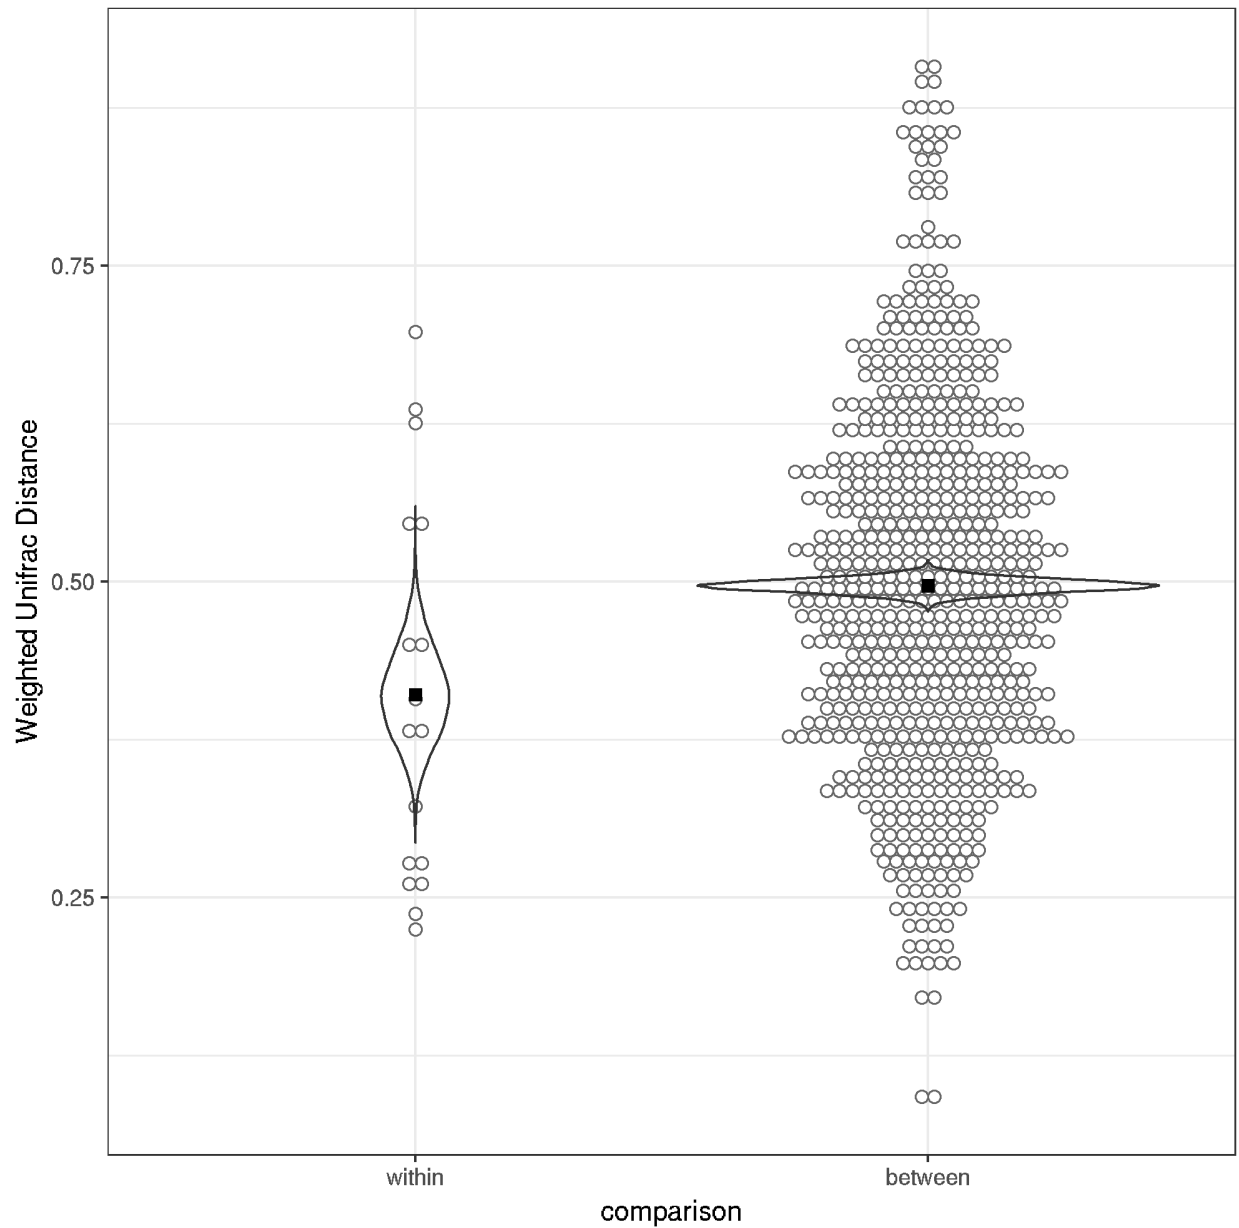

S2 Fig. Weighted unifrac distances between samples taken within the same participant at different time points (“within”), and between different participants from all time points (“between”) -- open circles. Black squares indicate the mean unifrac distance for the “within” and “between” participants samples. Violins show the bootstrapped distributions of those means. Samples taken between participants have a weighted UniFrac distance that is 0.087 larger than those taken from within the same participant (bootstrapped 95% confidence interval: 0.012-0.154; permutation based  $p = 0.02$ ).
